# Supplementary material for: Green solid-state synthesis of Cu4O3/biochar composites with high antimicrobial activity
Source: Royal Society of Chemistry journal article supplement (doi:10.1039/d4gc04616a), 2024-12-24
Supplement: d4gc04616a1.pdf [file d4gc04616a1.pdf]

## checkCIF (basic structural check) running

---

*Checking for embedded fcf data in CIF ...*  
*No extractable fcf data in found in CIF*

## checkCIF/PLATON (basic structural check)

---

You have not supplied any structure factors. As a result the full set of tests cannot be run.

The following datablock(s) have been identified as calculated data and have not been validated: opt-manual

---

Download CIF editor (publCIF) from the IUCr  
Download CIF editor (enCIFer) from the CCDC  
Test a new CIF entry
